# Supplementary material for: Levosimendan in pulmonary hypertension and right heart failure
Source: PubMed Central journal article supplement — Pulm Circ. 2018 Jul 6;8(3):2045894018790905. doi: 10.1177/2045894018790905 (PMC6058424; doi:10.1177/2045894018790905), 2018-07-06
Supplement: Supplemental_material.pdf [file Supplemental_material.pdf]

## Supplementary material

**Table 1: Levosimendan in experimental PH and associated right heart failure (RHF).**

|                                          | Model of PH              | Dosing                                   | Study design                                                          | Findings                                                                                                                                                                                                                            |
|------------------------------------------|--------------------------|------------------------------------------|-----------------------------------------------------------------------|-------------------------------------------------------------------------------------------------------------------------------------------------------------------------------------------------------------------------------------|
| <b>Hansen et al. 2017<sup>1</sup></b>    | Rats, PTB                | 3 mg/kg/day p.o.                         | 7 weeks prevention                                                    | Improved RV function, no increase in RV myocardial oxygen consumption, improved RV myocardial external efficiency.                                                                                                                  |
| <b>Hansen et al. 2016<sup>2</sup></b>    | Rats, Sugen5416+ hypoxia | 3 mg/kg/day p.o.                         | 10 weeks prevention and 6 weeks reversal treatment in established RHF | Improved RV function, reduced RV afterload, and improved right ventricular-pulmonary arterial coupling. Reduced pulmonary arterial occlusive lesions, reduced BNP and ANP, increased capillary density, reduced cardiomyocyte size. |
| <b>Hillgaard et al. 2016<sup>3</sup></b> | Rats, PTB                | 3 mg/kg/day p.o.                         | 7 weeks prevention and 4 weeks reversal treatment in RHF              | Improved RV function and contractility.                                                                                                                                                                                             |
| <b>Vildbrad et al. 2014<sup>4</sup></b>  | Rats, PTB and MCT        | 12 µg/kg for 10 min, 60 µg/kg for 10 min | Acute treatment in established RHF                                    | Improved RV contractility and RV lusitropy in both models. Improved RV function in the MCT model but not in the PTB model. Reduced mean systemic                                                                                    |

---

blood pressure.

|                                         |                                      |                                                                                 |                                    |                                                                                                                                                                                  |
|-----------------------------------------|--------------------------------------|---------------------------------------------------------------------------------|------------------------------------|----------------------------------------------------------------------------------------------------------------------------------------------------------------------------------|
| <b>Wiklund et al. 2012<sup>5</sup></b>  | Pigs, hypoxia                        | 6 µg/kg for 10 min,<br>0.1 µg/kg for 10 min,<br>0.2 µg/kg for 70 min            | Acute treatment in acute PH        | Improved RV function. Reduced mPAP and PVR.                                                                                                                                      |
| <b>Reverman et al. 2011<sup>6</sup></b> | Rats, MCT                            | 3 mg/kg/day p.o.                                                                | 3 weeks reversal treatment         | Reduced pulmonary vascular medial wall thickness and proliferation of pulmonary arterial smooth muscle cells. Reduced RV hypertrophy.                                            |
| <b>Schwarte et al. 2011<sup>7</sup></b> | Dogs, hypoxia                        | 20.0 µg/kg for 15 min,<br>0.25 µg/kg for the remaining period                   | Acute treatment in acute PH        | Improved RV function and contractility. Decreased systemic vascular resistance.                                                                                                  |
| <b>Chew et al. 2011<sup>8</sup></b>     | Pigs, endotoxin-induced PH           | 0.2 µg/kg/min for 6 hours                                                       | Acute treatment in acute PH        | No improvement in cardiac, renal or liver function. Increased pulmonary capillary wedge pressure. Hyperlactataemia, acidosis and increases in plasma pro-inflammatory cytokines. |
| <b>Boost et al. 2008<sup>9</sup></b>    | Rats, ventilator-induced lung injury | Inhalation of 240 µg, or<br>inhalation of 24 µg, or<br>24 µg/kg i.v. for 10 min | Acute treatment before lung injury | Improved survival and reduced release of inflammatory mediators.                                                                                                                 |
| <b>Missant et</b>                       | Pigs, PA                             | 120 µg/kg/min for 10 min,                                                       | Acute treatment in acute PH        | Improved RV contractility, reduced RV afterload,                                                                                                                                 |

|                                         |                                             |                                                                                                                                                                            |                                 |                                                                                                                                                                                                                                             |
|-----------------------------------------|---------------------------------------------|----------------------------------------------------------------------------------------------------------------------------------------------------------------------------|---------------------------------|---------------------------------------------------------------------------------------------------------------------------------------------------------------------------------------------------------------------------------------------|
| <b>al. 2007<sup>10</sup></b>            | constriction<br>+ischemia/reperfusion       | 60 µg/kg/min for 45 min                                                                                                                                                    |                                 | and restored right ventricular arterial coupling.<br>Increased coronary blood flow.                                                                                                                                                         |
| <b>Kerbaul et al. 2007<sup>11</sup></b> | Piglets, repeated acute pulmonary embolisms | 20 µg/kg for 10 min,<br>0.2 µg/kg/min for 20 min                                                                                                                           | Acute treatment in acute PH     | Improved RV contractility, reduced RV afterload, and restored right ventricular arterial coupling.                                                                                                                                          |
| <b>Kerbaul et al. 2006<sup>12</sup></b> | Dogs, transient PA constriction             | 12 µg/kg for 10 min,<br>0.1 µg/kg/min for 20 min,<br>0.1 µg/kg/min for 30 min                                                                                              | Acute treatment in acute PH     | Improved RV contractility, reduced RV afterload, and restored right ventricular arterial coupling.                                                                                                                                          |
| <b>Leather et al. 2003<sup>13</sup></b> | Pigs, controls                              | 40 µg/kg/hour for 10 min,<br>20 µg/kg/hour for 30 min,<br>80 µg/kg/hour for 10 min,<br>40 µg/kg/hour for 30 min,<br>160 µg/kg/hour for 10 min,<br>80 µg/kg/hour for 30 min | Acute treatment in healthy pigs | Improved RV function and contractility. No change in right ventricular arterial coupling. Improved RV lusitropy. No change in right coronary artery flow and RV oxygen consumption. RV mechanical efficiency decreased at the highest dose. |
| <b>De Witt et al. 2002<sup>14</sup></b> | Cats, thromboxane-induced PAH               | 0.3, 1, or 3 µg injection into the perfused lobar artery                                                                                                                   | Acute treatment in acute PH     | Reduced pulmonary arterial perfusion pressure.                                                                                                                                                                                              |

ANP, atrial natriuretic peptide; BNP, B-type natriuretic peptide; MCT, monocrotaline; mPAP, mean pulmonary arterial pressure; PA, pulmonary artery; PAH, pulmonary arterial hypertension; PH, pulmonary hypertension; PTB, pulmonary trunk banding; PVR, pulmonary vascular resistance; RHF, right heart failure; RV, right ventricular.

**Table 2: Levosimendan in PAH**

| Reference                                 | Study design            | n  | Population                                        | Comparator | Dose                                                                           | Follow up | Findings                                                                                                                                                                                                                          |
|-------------------------------------------|-------------------------|----|---------------------------------------------------|------------|--------------------------------------------------------------------------------|-----------|-----------------------------------------------------------------------------------------------------------------------------------------------------------------------------------------------------------------------------------|
| <b>Jiang et al. 2017<sup>15</sup></b>     | Single arm, prospective | 45 | PAH patients with severe acute RHF, WHO-FC III-IV | None       | 0.05-0.1 µg/kg/min up to 12.5 mg                                               | 7 days    | WHO-FC improved by one class, improvement in Borg dyspnea scores, 6-min walk test and NT-proBNP.                                                                                                                                  |
| <b>Martyniuk et al. 2012<sup>16</sup></b> | Prospective, single arm | 9  | iPAH and severe RHF, NYHA class III and IV        | None       | 24-hour intravenous levosimendan infusion                                      | 12 weeks  | 24 hour: Reduced PVR and PAP.<br>Increased exercise tolerance. Reduced NT-proBNP.<br>12 weeks: Preserved improved functional status. No changes in the achieved hemodynamic parameters. No clinically relevant adverse reactions. |
| <b>Cavusoglu et al. 2009<sup>17</sup></b> | Case report             | 2  | Acutely decompensated iPAH with negative          | None       | 12 µg/kg in 10 min, 0.1 µg/kg/min for 60 min, 0.2 µg/kg/min until discontinued |           | Increase in PAP.                                                                                                                                                                                                                  |

vasoreactive  
response

|                      |     |    |                                         |         |                                                                                                                                        |             |                                                                                                  |
|----------------------|-----|----|-----------------------------------------|---------|----------------------------------------------------------------------------------------------------------------------------------------|-------------|--------------------------------------------------------------------------------------------------|
| <b>Kleber et al.</b> | RCT | 28 | PH patients,<br>NYHA class III to<br>IV | Placebo | Visit 1:<br>12 µg/kg in 10 min,<br>0.1 µg/kg/min for 50 min,<br>0.2 µg/kg/min for 23 hours.<br>Visit 2-5:<br>0.2 µg/kg/min for 6 hours | 12<br>weeks | Reduced PVR and PAP. Continued<br>efficacy with repeated dosing. No<br>development of tolerance. |
|----------------------|-----|----|-----------------------------------------|---------|----------------------------------------------------------------------------------------------------------------------------------------|-------------|--------------------------------------------------------------------------------------------------|

CHD, congenital heart disease; iPAH, idiopathic pulmonary arterial hypertension; LHD, left heart disease; NT-proBNP, N-terminal pro-brain natriuretic peptide; NYHA, New York Heart Association; PAP, pulmonary arterial pressure; PVR, pulmonary vascular resistance; WHO-FC, world health organization functional class.

**Table 3: Levosimendan in PH caused by left heart failure**

| Reference                                   | Study design            | n  | Population                                    | Inclusion criteria                                                                                           | Comparator | Dose                                           | Follow-up | Findings                                                                                                                                                                                                                                     |
|---------------------------------------------|-------------------------|----|-----------------------------------------------|--------------------------------------------------------------------------------------------------------------|------------|------------------------------------------------|-----------|----------------------------------------------------------------------------------------------------------------------------------------------------------------------------------------------------------------------------------------------|
| <b>Mishra et al. 2016<sup>19</sup></b>      | RCT                     | 40 | Patients undergoing valve replacement with PH | LVEF <50%/60% and PAH (RVSP >50 mmHg, or mPAP >40 mmHg or sPAP exceeding 50% of systemic systolic pressure). | Milrinone  | 10 µg/kg in 10 min, 0.1 µg/kg/min for 24 hours | 24 hours  | Reduced mPAP and PVR index, and improved biventricular function to the same extent as milrinone. Levosimendan resulted in a greater increase in heart rate, decrease in systemic vascular resistance, and a greater need for norepinephrine. |
| <b>Alibaz-Oner et al. 2013<sup>20</sup></b> | Single arm, prospective | 30 | NYHA III-IV, ischaemic LHF                    | LVEF <40%                                                                                                    | Baseline   | 0.05 µg/kg/min for 48 hours                    | 72 hours  | Improved RV systolic function indicated by TDI derived parameters. No change in RV diastolic function. Reduced sPAP and BNP. Improved NYHA class.                                                                                            |

|                                                   |                            |    |                                                                              |                                                                         |                |                                                                                                       |             |                                                                                                                                                                                  |
|---------------------------------------------------|----------------------------|----|------------------------------------------------------------------------------|-------------------------------------------------------------------------|----------------|-------------------------------------------------------------------------------------------------------|-------------|----------------------------------------------------------------------------------------------------------------------------------------------------------------------------------|
| <b>Sponga et al.</b><br><b>2012</b> <sup>21</sup> | Single arm,<br>prospective | 21 | Patients<br>admitted for<br>LVAD with RV<br>dysfunction and<br>RV dilatation |                                                                         | Baseline       | 0.1 to 0.2<br>µg/kg/min for 48<br>hours                                                               | 72<br>hours | Improved CI. Decreased PAP,<br>PCWP, and central venous<br>pressure.                                                                                                             |
| <b>Russ et al.</b><br><b>2009</b> <sup>22</sup>   | Single arm,<br>prospective | 25 | LHF following<br>acute<br>myocardial<br>infarction                           |                                                                         | Baseline       | 12 µg/kg/min for<br>10 min,<br>0.1 µg/kg/min for<br>50 min,<br>0.05-0.2<br>µg/kg/min for 23<br>hours. | 48<br>hours | Improved RV and LV<br>contractility. Decreased RV<br>afterload.                                                                                                                  |
| <b>Yilmaz et al.</b><br><b>2009</b> <sup>23</sup> | RCT                        | 40 | NYHA III-IV,<br>acute LHF                                                    | LVEF □35%.<br>RV dysfunction<br>with RV fractional<br>area change □24%. | Dobutami<br>ne | 0.1 µg/kg/min for<br>6 hours,<br>0.2 µg/kg/min for<br>18 hours                                        | 24<br>hours | Improved RV function and<br>decreased sPAP to the same<br>extent as dobutamine. TAPSE,<br>24-h urine output, and<br>creatinine improved greater in<br>patients with levosimendan |



|                                          |                         |    |                                                        |                                                                                                        |            |                                                                 |          |                                                                                                                                                                                      |
|------------------------------------------|-------------------------|----|--------------------------------------------------------|--------------------------------------------------------------------------------------------------------|------------|-----------------------------------------------------------------|----------|--------------------------------------------------------------------------------------------------------------------------------------------------------------------------------------|
|                                          |                         |    |                                                        |                                                                                                        |            |                                                                 |          | compared to dobutamine.                                                                                                                                                              |
| <b>Poelzl et al. 2008<sup>24</sup></b>   | Single arm, prospective | 18 | Acute LHF                                              | LVEF $\leq$ 30%,<br>CI $\leq$ 2.5 l/min/m <sup>2</sup> ,<br>RAP $\geq$ 10 mmHg,<br>PCWP $\geq$ 15 mmHg | Baseline   | 6-12 $\mu$ g/kg in 10 min,<br>0.075-0.2 $\mu$ g/kg/min for 24 h | 24 hours | Improved RV and LV contractility. No change in RV afterload. Decreased PCWP and systemic vascular resistance.                                                                        |
| <b>Duygu et al. 2008<sup>25</sup></b>    | RCT                     | 62 | NYHA III-IV, acute LHF due to ischaemic cardiomyopathy | LVEF <40%                                                                                              | Dobutamine | 6–12 $\mu$ g/kg in 10 min,<br>0.1 $\mu$ g/kg/min for 24 hours   | 24 hours | Improved RV systolic and diastolic function. Dobutamine did not improve RV function. Reduced sPAP to a greater extent than dobutamine.                                               |
| <b>Parissis et al. 2006<sup>26</sup></b> | RCT                     | 54 | NYHA III-IV, LV systolic dysfunction                   | LVEF <35%                                                                                              | Placebo    | 0.1-0.2 $\mu$ g/kg/min for 24 h                                 | 48 hours | Improved Doppler echocardiographic markers of systolic and diastolic RV function. Decreased systolic PAP. Reduced BNP levels. Altered the balance between pro- and anti-inflammatory |

cytokines in favor of the anti-inflammatory activation.

|                                         |                                   |     |                                       |                                                               |         |                                                                              |         |                                                                                                                                                                                                                              |
|-----------------------------------------|-----------------------------------|-----|---------------------------------------|---------------------------------------------------------------|---------|------------------------------------------------------------------------------|---------|------------------------------------------------------------------------------------------------------------------------------------------------------------------------------------------------------------------------------|
| <b>Ukkonen et al. 2000<sup>27</sup></b> | Randomized double-blind crossover | 8   | NYHA III-IV, congestive heart failure |                                                               | Placebo | 18 µg/kg in 10 min, 0.3 µg/kg/min                                            |         | Improved LV function. Reduced coronary, pulmonary, and systemic vascular resistance. Increased mean myocardial blood flow. Neutral on biventricular oxygen consumption and LV efficiency. Improved RV mechanical efficiency. |
| <b>Slawsky et al. 2000<sup>28</sup></b> | Double-blinded RCT                | 146 | NYHA III-IV, LV systolic dysfunction  | LVEF < 30%<br>PCWP > 15 mmHg<br>CI < 2.5 L/min/m <sup>2</sup> | Placebo | 6 µg/kg bolus initially and at hourly interval 0.1-0.4 µg/kg/min for 6 hours | 6 hours | Improved LV function. Decreases PCWP, mRAP, and mPAP. Improved dyspnea and fatigue.                                                                                                                                          |

BNP, B-type natriuretic peptide; CI, cardiac index; LHF, left heart failure; LV, left ventricular; LVAD, left ventricular assist device; LVEF, left ventricular ejection fraction; NYHA, New York Heart Association; PAOP, pulmonary artery occlusion pressure; PAP, pulmonary arterial pressure; PCWP, pulmonary capillary wedge pressure; RAP, right atrial pressure; RCT, randomized clinical trial; RV, right ventricular; TDI, tissue doppler imaging.

**Table 4: Levosimendan in PH and congenital heart disease (CHD)**

| Reference                                    | Design     | n  | Population                                                                                      | Inclusion criteria | Comparator | Dose                                                                                                         | Follow up   | Findings                                                                                                                 |
|----------------------------------------------|------------|----|-------------------------------------------------------------------------------------------------|--------------------|------------|--------------------------------------------------------------------------------------------------------------|-------------|--------------------------------------------------------------------------------------------------------------------------|
| <b>Rafiq et al. 2015<sup>29</sup></b>        | Case study | 1  | End stage cardiac failure and PH due to CHD. 30 years old.                                      |                    | Baseline   | Pulsed i.v. levosimendan; Initially 2 vials per month for 6 months, reduced to 1 vial per month for 4 months | Until death | Reduced hospital admissions, improved exercise tolerance, no longer home diuresis. Survival 1 year longer than expected. |
| <b>Schwiebacher et al. 2013<sup>30</sup></b> | Case study | 1  | 14-year-old boy with LV dysfunction and PH due to CHD, referred for heart-lung transplantation. |                    | Baseline   | 0.1 µg/kg/min for 24 hours                                                                                   | 7 weeks     | Decreased pulmonary capillary wedge pressure, increased mPAP and transpulmonary pressure gradient, CI remained stable.   |
| <b>Ebade et al. 2013<sup>31</sup></b>        | RCT        | 50 | Children with cardiac septal defects                                                            | sPAP exceeding     | Dobutamine | 15 µg/kg in 10 min, 0.1–0.2 µg/kg/min for                                                                    | 20 hours    | Both levosimendan and dobutamine reduced PAP but mPAP was lower with                                                     |

|                                            |                                      |        |                                                                                                                                 |                                   |          |                                                        |          |                                                                                                                                                                                   |
|--------------------------------------------|--------------------------------------|--------|---------------------------------------------------------------------------------------------------------------------------------|-----------------------------------|----------|--------------------------------------------------------|----------|-----------------------------------------------------------------------------------------------------------------------------------------------------------------------------------|
|                                            |                                      |        | assigned for surgical correction. Mean age 17.5 months.                                                                         | 50% of systemic systolic pressure |          | 24 hours                                               |          | levosimendan compared with dobutamine. Both levosimendan and dobutamine improved CI but mean CI was higher with levosimendan compared with dobutamine.                            |
| <b>Lechner et al. 2007<sup>32</sup></b>    | Case report                          | 1      | Patient with TGA who underwent arterial switch operation. Postoperative LCOS and sPAP 50 mmHg, but no RV failure. Age 32 weeks. |                                   | Baseline | 0.05 µg/kg/min increased to 0.1 µg/kg/min for 24 hours | 24 hours | Improved LV function, reduced left atrial pressure, reduced sPAP, normalized serum lactate level, increased mixed venous saturation.                                              |
| <b>Turanlahti et al. 2004<sup>33</sup></b> | Single arm, prospective, open label, | 1<br>3 | Children with CHD in the preoperative setting without LCOS. Age 3 months-7 years.                                               |                                   | Baseline | 12 µg/kg in 10 min                                     | 4 hours  | Pharmacokinetic profile in children with CHD is similar to that in adults LHF. No significant changes in hemodynamics. There were no serious adverse events or unexpected adverse |

| phase II                                |             |   |                                                                               | drug reactions during the study. |                                            |          |                                                                                                                                     |
|-----------------------------------------|-------------|---|-------------------------------------------------------------------------------|----------------------------------|--------------------------------------------|----------|-------------------------------------------------------------------------------------------------------------------------------------|
| <b>Luther et al. 2004</b> <sup>34</sup> | Case report | 1 | 9-months-old child with LV dysfunction and PH due to CHD.                     | Baseline                         | 0.1 µg/kg/min for 24 hours                 | 7 months | Improved LV function, increased CI, decreased pulmonary vascular resistance, and reduced the frequency and extent of the PH crises. |
| <b>Braun et al. 2004</b> <sup>35</sup>  | Case report | 1 | 2-month-old baby with CHD. Postoperative acute LHF, PH, and right-left-shunt. | Baseline                         | 24 µg/kg bolus, 0.2 µg/kg/min for 48 hours | 6 days   | Improvement of LV function. Reduction of PVR, no right-left-shunt,                                                                  |

CHD, congenital heart disease; CI, cardiac index; LCOS, low cardiac output syndrome; LHF, left heart failure; LV, left ventricular; PH, pulmonary hypertension; PAP, pulmonary arterial pressure; TGA, transposition of the great arteries.

## References:

1. Hansen MS, Andersen A, Tolbod L, Hansson N, Nielsen R, Vonk-Noordegraaf A, Nielsen-Kudsk, JE. Levosimendan improves cardiac function and myocardial efficiency in rats with right ventricular failure. *Pulmonary circulation*. Forthcoming 2017.
2. Hansen MS, Andersen A, Holmboe S, et al. Levosimendan prevents and reverts pressure-overload induced right ventricular failure. *European heart journal*. 2016; 37: 625.
3. Hillgaard TK, Andersen A, Andersen S, et al. Levosimendan Prevents Pressure-Overload-induced Right Ventricular Failure. *Journal of cardiovascular pharmacology*. 2016; 67: 275-82.
4. Vildbrad MD, Andersen A, Holmboe S, Ringgaard S, Nielsen JM and Nielsen-Kudsk JE. Acute effects of levosimendan in experimental models of right ventricular hypertrophy and failure. *Pulmonary circulation*. 2014; 4: 511-9.
5. Wiklund A, Kylhammar D and Radegran G. Levosimendan attenuates hypoxia-induced pulmonary hypertension in a porcine model. *Journal of cardiovascular pharmacology*. 2012; 59: 441-9.
6. Revermann M, Schloss M, Mieth A, et al. Levosimendan attenuates pulmonary vascular remodeling. *Intensive care medicine*. 2011; 37: 1368-77.
7. Schwarte LA, Schwartges I, Thomas K, Schober P and Picker O. The effects of levosimendan and glibenclamide on circulatory and metabolic variables in a canine model of acute hypoxia. *Intensive care medicine*. 2011; 37: 701-10.
8. Chew MS, Hawthorne WJ, Bendall J, et al. No beneficial effects of levosimendan in acute porcine endotoxaemia. *Acta anaesthesiologica Scandinavica*. 2011; 55: 851-61.

9. Boost KA, Hoegl S, Dolfen A, et al. Inhaled levosimendan reduces mortality and release of proinflammatory mediators in a rat model of experimental ventilator-induced lung injury. *Critical care medicine*. 2008; 36: 1873-9.
10. Missant C, Rex S, Segers P and Wouters PF. Levosimendan improves right ventriculovascular coupling in a porcine model of right ventricular dysfunction. *Critical care medicine*. 2007; 35: 707-15.
11. Kerbaul F, Gariboldi V, Giorgi R, et al. Effects of levosimendan on acute pulmonary embolism-induced right ventricular failure. *Critical care medicine*. 2007; 35: 1948-54.
12. Kerbaul F, Rondelet B, Demester JP, et al. Effects of levosimendan versus dobutamine on pressure load-induced right ventricular failure. *Critical care medicine*. 2006; 34: 2814-9.
13. Leather HA, Ver Eycken K, Segers P, Herijgers P, Vandermeersch E and Wouters PF. Effects of levosimendan on right ventricular function and ventriculovascular coupling in open chest pigs. *Critical care medicine*. 2003; 31: 2339-43.
14. De Witt BJ, Ibrahim IN, Bayer E, et al. An analysis of responses to levosimendan in the pulmonary vascular bed of the cat. *Anesthesia and analgesia*. 2002; 94: 1427-33, table of contents.
15. Jiang R, Zhao QH, Wu WH, et al. Efficacy and safety of a calcium sensitizer, levosimendan, in patients with right heart failure due to pulmonary hypertension. *The clinical respiratory journal*. 2017.
16. Martyniuk TV, Arkhipova OA, Kobal EA, Danilov NM and Chazova IE. [Possibilities of using levosimendan in patients with idiopathic pulmonary hypertension]. *Terapevticheskii arkhiv*. 2012; 84: 83-8.



17. Cavusoglu Y, Beyaztas A, Beyaztas S, Tek M, Birdane A and Ata Eskisehir N. Levosimendan is not effective in reducing pulmonary pressures and improving clinical symptoms in patients with acutely decompensated idiopathic pulmonary arterial hypertension. *European Journal of Heart Failure, Supplement*. 2009; 8: ii177.
18. Kleber F, Bollmann T, Borst M, et al. Repetitive dosing of intravenous levosimendan improves pulmonary hemodynamics in patients with pulmonary hypertension: results of a pilot study. *Journal of clinical pharmacology* 49: 109-15 (2009).
19. Mishra A, Kumar B, Dutta V, Arya VK and Mishra AK. Comparative Effect of Levosimendan and Milrinone in Cardiac Surgery Patients With Pulmonary Hypertension and Left Ventricular Dysfunction. *Journal of cardiothoracic and vascular anesthesia*. 2016; 30: 639-46.
20. Alibaz-Oner F, Gurbuz O, Oner E, Yurdakul S and Erguney M. Impact of levosimendan on right ventricular functions by using novel tissue Doppler derived indices in patients with ischaemic left ventricular failure. *Kardiologia polska* 71: 1036-41 (2013).
21. Sponga S, Ivanitskaia E, Potapov E, Krabatsch T, Hetzer R and Lehmkuhl H. Preoperative treatment with levosimendan in candidates for mechanical circulatory support. *ASAIO journal (American Society for Artificial Internal Organs : 1992)*. 2012; 58: 6-11.
22. Russ MA, Prondzinsky R, Carter JM, et al. Right ventricular function in myocardial infarction complicated by cardiogenic shock: Improvement with levosimendan. *Critical care medicine*. 2009; 37: 3017-23.
23. Yilmaz M, Yontar C, Erdem A, et al. Comparative effects of levosimendan and dobutamine on right ventricular function in patients with biventricular heart failure. *Heart and vessels* 24: 16-21 (2009).
24. Poelzl G, Zwick RH, Grandner W, et al. Safety and effectiveness of levosimendan in patients with predominant right heart failure. *Herz*. 2008; 33: 368-73.

25. Duygu H, Ozerkan F, Zoghi M, et al. Effect of levosimendan on right ventricular systolic and diastolic functions in patients with ischaemic heart failure. *International Journal of Clinical Practice*. 2008; 62: 228-33.
26. Parissis J, Paraskevaidis I, Bistola V, et al. Effects of levosimendan on right ventricular function in patients with advanced heart failure. *The American journal of cardiology* 98: 1489-92 (2006).
27. Ukkonen H, Saraste M, Akkila J, et al. Myocardial efficiency during levosimendan infusion in congestive heart failure. *Clinical pharmacology and therapeutics* 68: 522-31 (2000).
28. Slawsky M, Colucci W, Gottlieb S, et al. Acute hemodynamic and clinical effects of levosimendan in patients with severe heart failure. Study Investigators. *Circulation* 102: 2222-7 (2000).
29. Rafiq I and Freeman LJ. Pulsed levosimendan therapy in the management of chronic end stage cardiac failure in 'adult congenital heart disease'. *International journal of cardiology*. 2015; 195: 283-4.
30. Schwienbacher M, Schweigmann U, Neu N, et al. Heart Transplantation in a 14-Year-Old Boy in the Presence of Severe Out-of-Proportion Pulmonary Hypertension due to Restrictive Left Heart Disease: A Case Report. *Case reports in cardiology*. 2013; 2013: 418565.
31. Ebade A, Khalil M and Mohamed A. Levosimendan is superior to dobutamine as an inodilator in the treatment of pulmonary hypertension for children undergoing cardiac surgery. *Journal of anesthesia* 27: 334-9 (2013).
32. Lechner E, Moosbauer W, Pinter M, Mair R and Tulzer G. Use of levosimendan, a new inodilator, for postoperative myocardial stunning in a premature neonate. *Pediatric critical care medicine : a journal of the Society of Critical Care Medicine and the World Federation of Pediatric Intensive and Critical Care Societies*. 2007; 8: 61-3.

33. Turanlahti M, Boldt T, Palkama T, Antila S, Lehtonen L and Pesonen E. Pharmacokinetics of levosimendan in pediatric patients evaluated for cardiac surgery. *Pediatric critical care medicine : a journal of the Society of Critical Care Medicine and the World Federation of Pediatric Intensive and Critical Care Societies*. 2004; 5: 457-62.
34. Luther YC, Schulze-Neick I, Stiller B, et al. Levosimendan - Long-term inodilation in an infant with myocardial infarction. *Zeitschrift fur Kardiologie*. 2004; 93: 234-9.
35. Braun JP, Schneider M, Kastrup M and Liu J. Treatment of acute heart failure in an infant after cardiac surgery using levosimendan. *European journal of cardio-thoracic surgery : official journal of the European Association for Cardio-thoracic Surgery*. 2004; 26: 228-30.
